# Supplementary material for: Comprehensive Exploration of M2 Macrophages and Its Related Genes for Predicting Clinical Outcomes and Drug Sensitivity in Lung Squamous Cell Carcinoma
Source: Hindawi journal article supplement (doi:10.1155/2022/1163924), 2022-09-14

# low vs high M2 macro

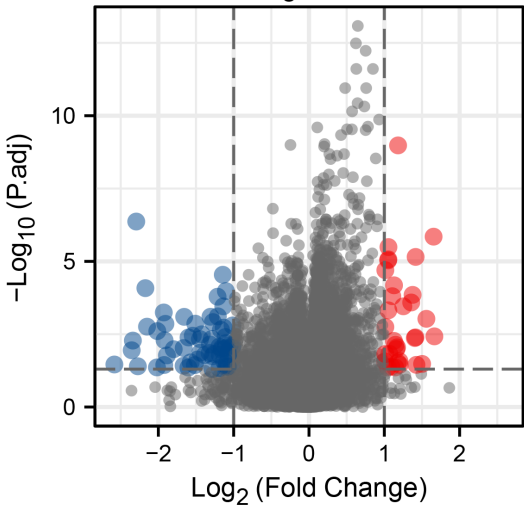

Supplement: f1 [file 1163924.f1.pdf]
